# Supplementary material for: Biomarkers allow detection of nutrient limitations and respective supplementation for elimination in Pichia pastoris fed-batch cultures
Source: PubMed Central journal article supplement (PMC5504661; doi:10.1186/s12934-017-0730-9), 2017-07-11
Supplement: 12934_2017_730_MOESM1_ESM.pdf [file 12934_2017_730_MOESM1_ESM.pdf]

## Biomarkers allow detection of nutrient limitations and respective supplementation for elimination in *Pichia pastoris* fed-batch cultures

Jonas Burgard, Minoska Valli, Alexandra B. Graf, Brigitte Gasser, Diethard Mattanovich

### Additional Figures and Tables

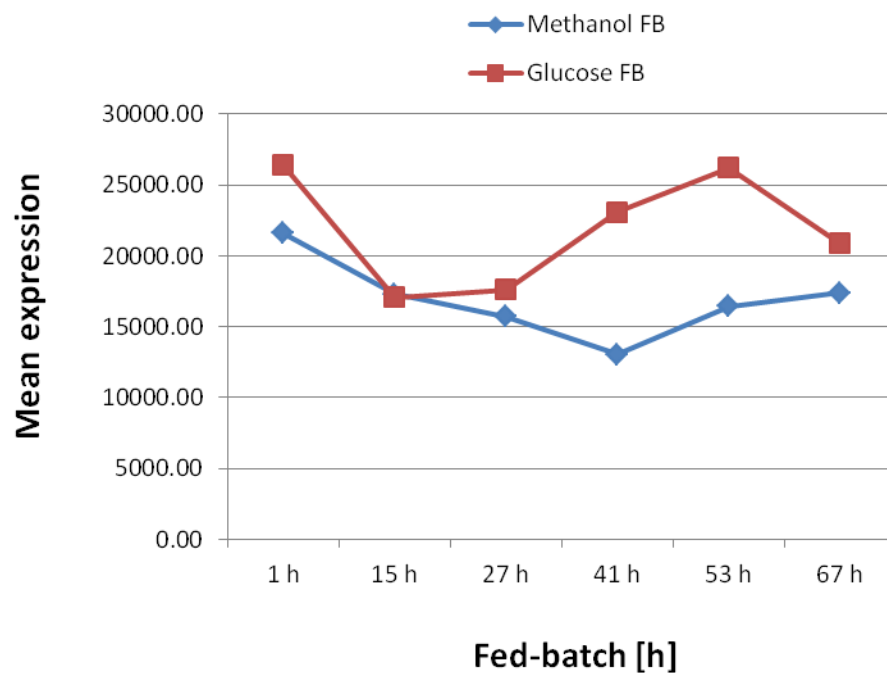

Additional Figure S1: Mean expression values (microarray data) of the carboxypeptidase B during the methanol and glucose fed-batch process

**Additional Table S2: Description of biological function of marker genes adapted from *Saccharomyces* Genome Database (SGD)**

| <b>ORF name</b> | <b>Description</b>                                                                                                                                                                                                        |
|-----------------|---------------------------------------------------------------------------------------------------------------------------------------------------------------------------------------------------------------------------|
| <b>PHO84</b>    | High-affinity inorganic phosphate (Pi) transporter; also low-affinity manganese transporter; regulated by Pho4p and Spt7p                                                                                                 |
| <b>PHO89</b>    | Plasma membrane Na <sup>+</sup> /Pi cotransporter; active in early growth phase; transcription regulated by inorganic phosphate concentrations and Pho4p                                                                  |
| <b>VTC1</b>     | Regulatory subunit of the vacuolar transporter chaperone (VTC) complex; VTC complex is involved in membrane trafficking, vacuolar polyphosphate accumulation, microautophagy and non-autophagic vacuolar fusion           |
| <b>PHO80</b>    | Cyclin; interacts with cyclin-dependent kinase Pho85p; regulates the response to nutrient levels and environmental conditions, including the response to phosphate limitation and stress-dependent calcium signaling      |
| <b>PHO81</b>    | Cyclin-dependent kinase (CDK) inhibitor; regulates Pho80p-Pho85p and Pcl7p-Pho85p cyclin-CDK complexes in response to phosphate levels                                                                                    |
| <b>GDE1</b>     | Glycerophosphocholine (GroPCho) phosphodiesterase; hydrolyzes GroPCho to choline and glycerolphosphate, for use as a phosphate source and as a precursor for phosphocholine synthesis                                     |
| <b>PHO5</b>     | Repressible acid phosphatase; 1 of 3 repressible acid phosphatases that also mediates extracellular nucleotide-derived phosphate hydrolysis; induced by phosphate starvation and coordinately regulated by PHO4 and PHO2  |
| <b>DAL4</b>     | Allantoin permease; expression sensitive to nitrogen catabolite repression and induced by allophanate, an intermediate in allantoin degradation                                                                           |
| <b>DAL5-2</b>   | Allantoate permease; ureidosuccinate permease; also transports dipeptides, though with lower affinity than for allantoate and ureidosuccinate; expression is constitutive but sensitive to nitrogen catabolite repression |
| <b>DUR3-1</b>   | Plasma membrane transporter for both urea and polyamines; expression is highly sensitive to nitrogen catabolite repression and induced by allophanate, the last intermediate of the allantoin degradative pathway         |
| <b>DUR3-2</b>   | Plasma membrane transporter for both urea and polyamines, expression is highly sensitive to nitrogen catabolite repression and induced by allophanate, the last                                                           |

|                |                                                                                                                                                                                                                                                                                                                                                              |
|----------------|--------------------------------------------------------------------------------------------------------------------------------------------------------------------------------------------------------------------------------------------------------------------------------------------------------------------------------------------------------------|
|                | intermediate of the allantoin degradative pathway                                                                                                                                                                                                                                                                                                            |
| <b>TPO2</b>    | Polyamine transporter of the major facilitator superfamily; specific for spermine; localizes to the plasma membrane                                                                                                                                                                                                                                          |
| <b>PUT1</b>    | Proline oxidase; nuclear-encoded mitochondrial protein involved in utilization of proline as sole nitrogen source; PUT1 transcription is induced by Put3p in the presence of proline and the absence of a preferred nitrogen source                                                                                                                          |
| <b>CAR1-1</b>  | Arginase, catabolizes arginine to ornithine and urea; expression responds to both induction by arginine and nitrogen catabolite repression                                                                                                                                                                                                                   |
| <b>GLT1</b>    | NAD(+)-dependent glutamate synthase (GOGAT); synthesizes glutamate from glutamine and alpha-ketoglutarate; with Gln1p, forms the secondary pathway for glutamate biosynthesis from ammonia; expression regulated by nitrogen source; assembles into filaments as cells approach stationary phase and under cytosolic acidification and starvation conditions |
| <b>DAL1</b>    | Allantoinase; converts allantoin to allantoate in the first step of allantoin degradation; expression sensitive to nitrogen catabolite repression                                                                                                                                                                                                            |
| <b>SEO1-1</b>  | Putative permease, member of the allantoate transporter subfamily of the major facilitator superfamily                                                                                                                                                                                                                                                       |
| <b>GAT1</b>    | Transcriptional activator of nitrogen catabolite repression genes; contains a GATA-1-type zinc finger DNA-binding motif; activity and localization regulated by nitrogen limitation and Ure2p                                                                                                                                                                |
| <b>YBR139W</b> | Putative serine type carboxypeptidase; role in phytochelatin synthesis; green fluorescent protein (GFP)-fusion protein localizes to the vacuole; expression induced by nitrogen limitation in a GLN3, GAT1-independent manner                                                                                                                                |
| <b>JLP1-1</b>  | Fe(II)-dependent sulfonate/alpha-ketoglutarate dioxygenase; involved in sulfonate catabolism for use as a sulfur source; contains sequence that resembles a J domain (typified by the E. coli DnaJ protein); induced by sulphur starvation                                                                                                                   |
| <b>MET32</b>   | Zinc-finger DNA-binding transcription factor; involved in transcriptional regulation of the methionine biosynthetic genes; targets strong transcriptional activator Met4p to promoters of sulfur metabolic genes; feedforward loop exists in the regulation of genes controlled by Met4p and Met32p                                                          |
| <b>MET4</b>    | Leucine-zipper transcriptional activator; responsible for regulation of sulfur amino acid pathway; requires different combinations of auxiliary factors Cbf1p,                                                                                                                                                                                               |

|               |                                                                                                                                                                                                                                 |
|---------------|---------------------------------------------------------------------------------------------------------------------------------------------------------------------------------------------------------------------------------|
|               | Met28p, Met31p and Met32p                                                                                                                                                                                                       |
| <b>SUL1</b>   | High affinity sulfate permease of the SulP anion transporter family; sulfate uptake is mediated by specific sulfate transporters Sul1p and Sul2p, which control the concentration of endogenous activated sulfate intermediates |
| <b>MUP1-1</b> | High affinity methionine permease; integral membrane protein with 13 putative membrane-spanning regions; also involved in cysteine uptake                                                                                       |
| <b>MUP3</b>   | Low affinity methionine permease; similar to Mup1p                                                                                                                                                                              |
| <b>YCT1</b>   | High-affinity cysteine-specific transporter; green fluorescent protein (GFP)-fusion protein localizes to the endoplasmic reticulum                                                                                              |

**Additional Table S3: qPCR primer sequences**

| <b>Primer name</b> | <b>Primer sequence</b>         |
|--------------------|--------------------------------|
| ACT1_Fwd           | CCTGAGGCTTTGTTCCACCCATCT       |
| ACT1_Rev           | GGAACATAGTAGTACCACCGGACATAACGA |
| JLP1-1_Fwd         | AGCATGGGACAACAGAAG             |
| JLP1-1_Rev         | TCAGCAAGAGGGGTAATTCG           |
| MET32_Fwd          | TTCTCCGACATCCTCCAT             |
| MET32_Rev          | AAGCCCTTCTGACATCTG             |
| SUL1_Fwd           | GATTTTACCTCCGCCAACTG           |
| SUL1_Rev           | CTGTCTCTCCTTCTTGTGT            |
| MUP1-1 Fwd         | GTCATCAAGTCACCAATCGT           |
| MUP1-1 Rev         | AGGCAGCAACACAGTGAA             |
| PHO84-1_Fwd        | AACCTCCCCAATACCACAAC           |
| PHO84-1_Rev        | GGCTCCCCTTTACCAGAA             |
| VTC1_Fwd           | AATTTCCGCTGGTCTGT              |
| VTC1_Rev           | GGCCCAAAACGGTCAT               |
| PHO81_Fwd          | AGCTCTCGTCAAACCTATTTCAG        |
| PHO81_Rev          | CAAACACCACACCACTCA             |
| PHO5_Fwd           | TGCTTACCGAGAGATTATTGTG         |
| PHO5_Rev           | AGGGCCAGAGGAACAGTCA            |
| DUR3-1_Fwd         | CAGCATCCTCCTTCCTTATAC          |
| DUR3-1_Rev         | AAGCAGCAACACTAAACCAA           |
| TPO2_Fwd           | CGGTCTTGCCTGTGGTATT            |
| TPO2_Rev           | ACCGAAGCTCCCCATATC             |

|          |                      |
|----------|----------------------|
| PUT1_Fwd | ATGGCAGACGATGTTACAC  |
| PUT1_Rev | CCGTTCTCCTCCAATCTTCT |
| DAL1_Fwd | GGAATTGCATCGGTCGGTTT |
| DAL1_Rev | GGCAGTGTTTCAGCGAAGT  |

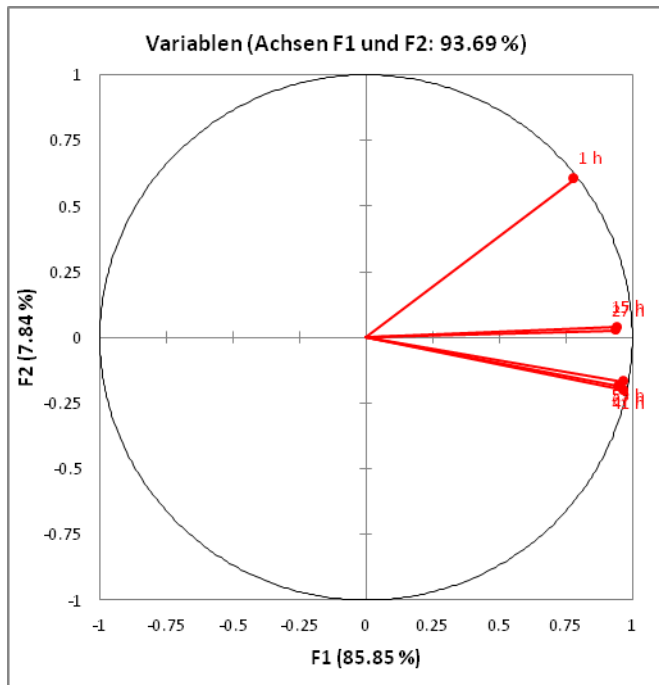

**Additional Figure S4: Principal component analysis (variable factor map; F2 vs. F1) of the methanol fed-batch (1 h, 15 h, 27 h, 41 h, 53 h and 67 h after starting the methanol fed-batch) referred to the glycerol fed-batch (log<sub>2</sub> fold change).**

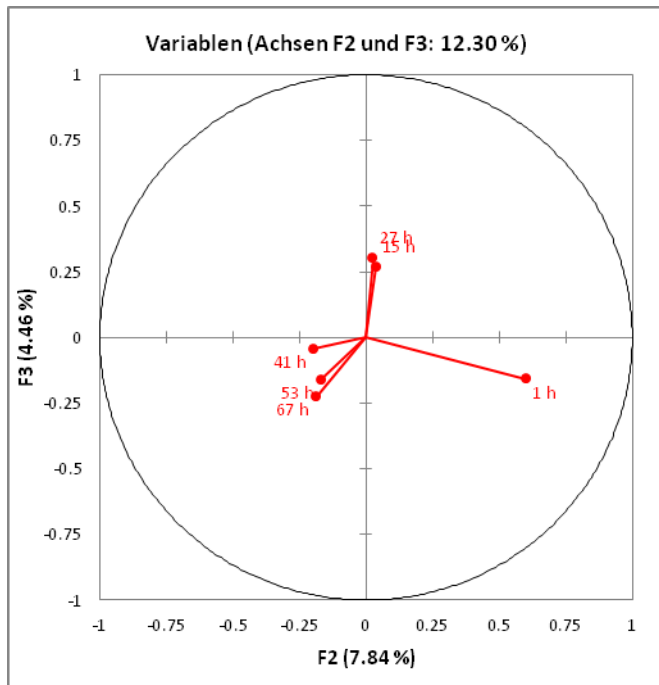

**Additional Figure S5: Principal component analysis (variable factor map; F3 vs. F2) of the methanol fed-batch (1 h, 15 h, 27 h, 41 h, 53 h and 67 h after starting the methanol fed-batch) referred to the glycerol fed-batch (log2 fold change).**



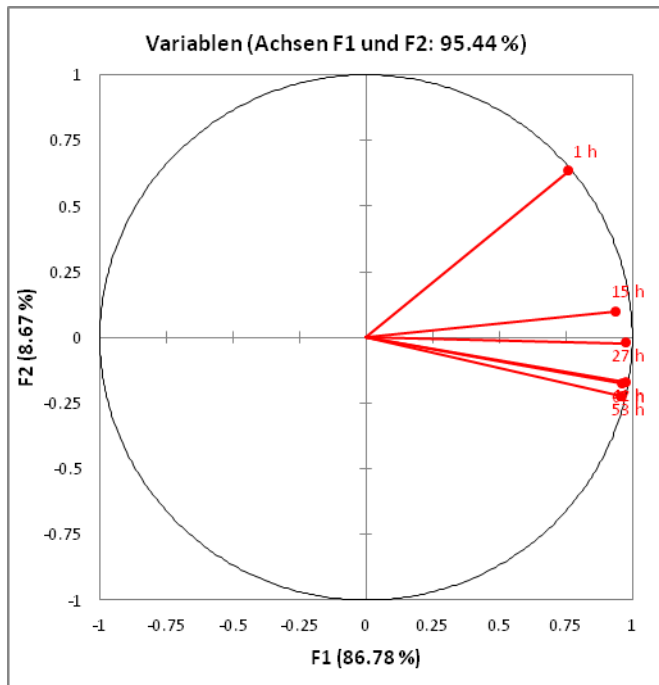

**Additional Figure S6: Principal component analysis (variable factor map; F2 vs. F1) of the glucose fed-batch (1 h, 15 h, 27 h, 41 h, 53 h and 67 h after starting the glucose fed-batch) referred to the glycerol fed-batch (log<sub>2</sub> fold change).**

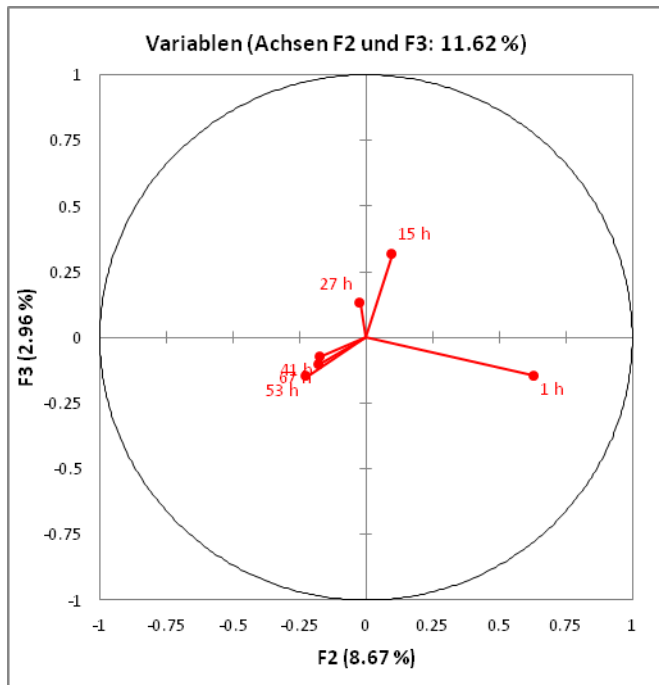

**Additional Figure S7: Principal component analysis (variable factor map; F3 vs. F2) of the glucose fed-batch (1 h, 15 h, 27 h, 41 h, 53 h and 67 h after starting the glucose fed-batch) referred to the glycerol fed-batch (log<sub>2</sub> fold change).**
